# Supplementary material for: Hydrothermal synthesis and crystal structure of a novel double-perovskite-type bismuth oxide with 3 : 1 ordering at the B-site
Source: Royal Society of Chemistry journal article supplement (doi:10.1039/d1nj05648d), 2022-01-01
Supplement: d1nj05648d1.pdf [file d1nj05648d1.pdf]

## Supporting information

### Hydrothermal synthesis and crystal structure of a novel double-perovskite-type bismuth oxide with 3:1 ordering at the B-site

Khandaker Monower Hossain<sup>a</sup>, Md Saiduzzaman<sup>b</sup>, Nobuhiro Kumada<sup>a\*</sup>, Takahiro Takei<sup>a</sup>, Hisanori Yamane<sup>c</sup>

<sup>a</sup>Center for Crystal Science and Technology, University of Yamanashi, 7-32 Miyamae-cho, Kofu 400-8511, Japan

<sup>b</sup>Department of Materials Science and Engineering, Khulna University of Engineering & Technology (KUET), Khulna-9203, Bangladesh

<sup>c</sup>Institute of Multidisciplinary Research for Advanced Materials, Tohoku University, Sendai 980-8577, Japan

Corresponding author email: [kumada@yamanashi.ac.jp](mailto:kumada@yamanashi.ac.jp)

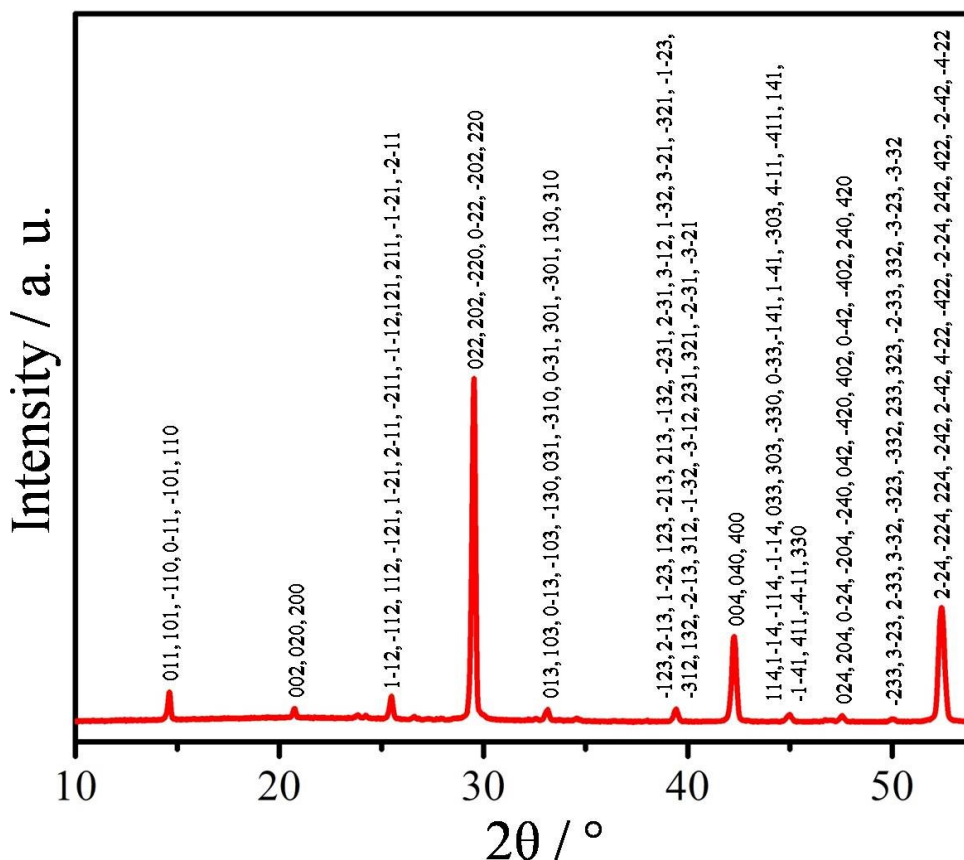

Fig. S1. XRD pattern of hydrothermally prepared sample at 240 °C.

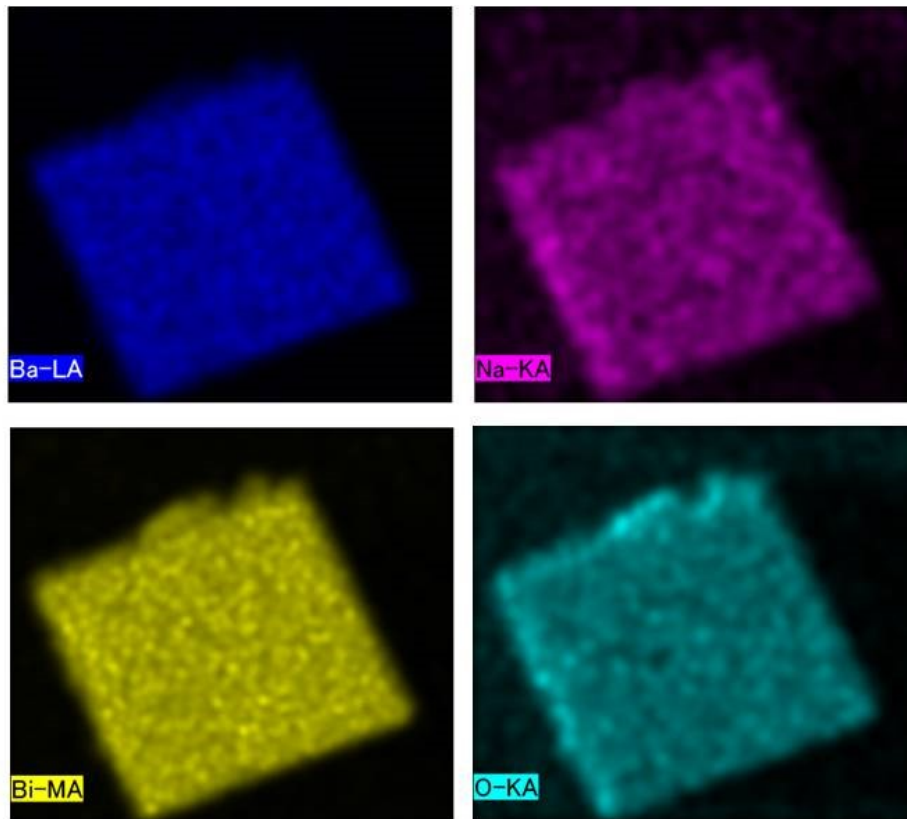

**Fig. S2.** EDS elemental mapping of hydrothermally synthesized  $\text{Ba}_4\text{Bi}_3\text{NaO}_{12}$ .

**Table S1.** Single-crystal data of Ba<sub>4</sub>Bi<sub>3</sub>NaO<sub>12</sub>

|                                                                   |                                                   |
|-------------------------------------------------------------------|---------------------------------------------------|
| Chemical formula                                                  | Ba <sub>4</sub> Bi <sub>3</sub> NaO <sub>12</sub> |
| Formula weight (g mol <sup>-1</sup> )                             | 1391.29                                           |
| Crystal color                                                     | Black                                             |
| Temperature, T (K)                                                | 298                                               |
| Crystal system                                                    | Triclinic                                         |
| Space group                                                       | <i>P</i> -1 (No. 2)                               |
| Unit-cell dimensions                                              |                                                   |
| <i>a</i> (Å)                                                      | 8.5415 (2)                                        |
| <i>b</i> (Å)                                                      | 8.5421 (2)                                        |
| <i>c</i> (Å)                                                      | 8.5441 (2)                                        |
| $\alpha$                                                          | 89.996 (1)°                                       |
| $\beta$                                                           | 89.995 (1)°                                       |
| $\gamma$                                                          | 90.016 (1)°                                       |
| Cell Volume, <i>V</i> (Å <sup>3</sup> )                           | 623.40 (3)                                        |
| <i>Z</i>                                                          | 2                                                 |
| Calculated density, <i>D</i> <sub>cal</sub> (g cm <sup>-3</sup> ) | 7.412                                             |
| Radiation wavelength, $\lambda$ (Å)                               | 0.71073                                           |
| Absorption coefficient, <i>m</i> (mm <sup>-1</sup> )              | 54.702                                            |
| <i>F</i> <sub>000</sub>                                           | 1160                                              |
| <i>N</i> <sub>ref</sub>                                           | 2870                                              |
| Goodness-of-fit on <i>F</i> <sup>2</sup> , <i>S</i>               | 1.167                                             |
| <i>R</i> <sub>1</sub> , <i>wR</i> <sub>2</sub> (all data)         | 0.0202, 0.0476                                    |

**Table S2.** Structural parameters of Ba<sub>4</sub>Bi<sub>3</sub>NaO<sub>12</sub>

| Atom | Site | x           | y           | z           | Occupancy   | U <sub>eq</sub> |
|------|------|-------------|-------------|-------------|-------------|-----------------|
| Bi1  | 1g   | 0           | 0.5         | 0.5         | 0.104 (2)   | 0.0121 (8)      |
| Na1  | 1g   | 0           | 0.5         | 0.5         | 0.896 (2)   | 0.0121 (8)      |
| Bi2  | 1d   | 0.5         | 0           | 0           | 0.103 (2)   | 0.0150 (9)      |
| Na2  | 1d   | 0.5         | 0           | 0           | 0.897 (2)   | 0.0150 (9)      |
| Bi3  | 1b   | 0           | 0           | 0.5         | 0.9602 (15) | 0.00825 (14)    |
| Na3  | 1b   | 0           | 0           | 0.5         | 0.0398 (15) | 0.00825 (14)    |
| Bi4  | 1e   | 0.5         | 0.5         | 0           | 0.9568 (15) | 0.00839 (14)    |
| Na4  | 1e   | 0.5         | 0.5         | 0           | 0.0432 (15) | 0.00839 (14)    |
| Bi5  | 1f   | 0.5         | 0           | 0.5         | 1.0         | 0.0100 (4)      |
| Bi6  | 1c   | 0           | 0.5         | 0           | 1.0         | 0.0102 (4)      |
| Bi7  | 1h   | 0.5         | 0.5         | 0.5         | 0.9369 (18) | 0.0101 (4)      |
| Na7  | 1h   | 0.5         | 0.5         | 0.5         | 0.0631 (18) | 0.0101 (4)      |
| Bi8  | 1a   | 0           | 0           | 0           | 0.9396 (18) | 0.0106 (4)      |
| Na8  | 1a   | 0           | 0           | 0           | 0.0604 (18) | 0.0106 (4)      |
| Ba1  | 2i   | 0.25113 (7) | 0.75094 (5) | 0.25029 (6) | 1.0         | 0.0271 (4)      |
| Ba2  | 2i   | 0.24917 (7) | 0.25072 (5) | 0.24890 (6) | 1.0         | 0.0270 (4)      |
| Ba3  | 2i   | 0.24968(6)  | 0.74945 (4) | 0.75019 (5) | 1.0         | 0.0118 (3)      |
| Ba4  | 2i   | 0.25001 (6) | 0.24939 (4) | 0.74878 (5) | 1.0         | 0.0115 (3)      |
| O1   | 2i   | 0.5128 (7)  | 0.9789 (6)  | 0.2684 (7)  | 1.0         | 0.0218 (12)     |
| O2   | 2i   | -0.0108 (7) | 0.4802 (6)  | 0.2316 (7)  | 1.0         | 0.0203 (12)     |
| O3   | 2i   | -0.0035 (7) | 0.2324 (4)  | 0.5279 (5)  | 1.0         | 0.0165 (8)      |
| O4   | 2i   | 0.5037 (7)  | 0.7328 (4)  | 0.9733 (5)  | 1.0         | 0.0160 (8)      |
| O5   | 2i   | 0.2661 (10) | 0.4963 (9)  | 0.5111 (9)  | 1.0         | 0.0372 (18)     |
| O6   | 2i   | 0.2322 (8)  | -0.0027 (7) | -0.0173 (7) | 1.0         | 0.0238 (14)     |
| O7   | 2i   | 0.2499 (8)  | 1.0035 (7)  | 0.4810 (7)  | 1.0         | 0.0282 (15)     |
| O8   | 2i   | 0.2474 (9)  | 0.5035 (8)  | 0.0106 (9)  | 1.0         | 0.042 (2)       |
| O9   | 2i   | 1.0107 (7)  | 0.0248 (7)  | 0.2495 (7)  | 1.0         | 0.0242 (12)     |
| O10  | 2i   | 0.4867 (7)  | 0.5235 (6)  | 0.2490 (7)  | 1.0         | 0.0225 (12)     |
| O11  | 2i   | 0.5029 (8)  | 0.2495 (7)  | 0.4683 (5)  | 1.0         | 0.0191 (8)      |
| O12  | 2i   | -0.0037 (8) | 0.7492 (7)  | 0.0291 (5)  | 1.0         | 0.0166 (8)      |

**Table S3.** Selected interatomic distance (Å) for Ba<sub>4</sub>Bi<sub>3</sub>NaO<sub>12</sub>

|             |           |             |           |
|-------------|-----------|-------------|-----------|
| Ba1-O1      | 2.968 (6) | Ba2-O2      | 2.966 (6) |
| Ba1-O3      | 2.843 (6) | Ba2-O4      | 2.842 (6) |
| Ba1-O5      | 3.117 (8) | Ba2-O5      | 3.073 (8) |
| Ba1-O6      | 3.112 (7) | Ba2-O6      | 3.143 (7) |
| Ba1-O7      | 2.922 (6) | Ba2-O7      | 2.897 (6) |
| Ba1-O8      | 2.943 (8) | Ba2-O8      | 2.968 (8) |
| Ba1-O9      | 3.113 (7) | Ba2-O9      | 2.806 (7) |
| Ba1-O10     | 2.797 (6) | Ba2-O10     | 3.089 (6) |
| Ba1-O12     | 2.883 (6) | Ba2-O11     | 2.866 (6) |
| <b>Mean</b> | 2.966     | <b>Mean</b> | 2.961     |
| <hr/>       |           |             |           |
| Ba3-O1      | 3.086 (6) | Ba4-O1      | 2.816 (6) |
| Ba3-O2      | 2.834 (6) | Ba4-O2      | 3.089 (6) |
| Ba3-O4      | 2.892 (6) | Ba4-O3      | 2.876 (6) |
| Ba3-O5      | 2.978 (8) | Ba4-O5      | 2.931 (8) |
| Ba3-O6      | 2.907 (6) | Ba4-O6      | 2.942 (6) |
| Ba3-O8      | 3.060 (8) | Ba4-O7      | 3.106 (6) |
| Ba3-O9      | 2.944 (6) | Ba4-O8      | 3.117 (8) |
| Ba3-O11     | 2.820 (6) | Ba4-O10     | 2.970 (6) |
| <b>Mean</b> | 2.940     | Ba4-O12     | 2.833 (6) |
|             |           | <b>Mean</b> | 2.964     |
| <hr/>       |           |             |           |
| Bi1/Na1-O2  | 2.301 (6) | Bi2/Na2-O1  | 2.303 (6) |
| Bi1/Na1-O2  | 2.301 (6) | Bi2/Na2-O1  | 2.303 (6) |
| Bi1/Na1-O3  | 2.298 (4) | Bi2/Na2-O4  | 2.294 (4) |
| Bi1/Na1-O3  | 2.298 (4) | Bi2/Na2-O4  | 2.294 (4) |
| Bi1/Na1-O5  | 2.275 (9) | Bi2/Na2-O6  | 2.292 (7) |
| Bi1/Na1-O5  | 2.275 (9) | Bi2/Na2-O6  | 2.292 (7) |
| <b>Mean</b> | 2.291     | <b>Mean</b> | 2.296     |
| <hr/>       |           |             |           |
| Bi3/Na3-O3  | 2.000 (4) | Bi4/Na4-O4  | 2.002 (4) |
| Bi3/Na3-O3  | 2.000 (4) | Bi4/Na4-O4  | 2.002 (4) |
| Bi3/Na3-O7  | 2.141 (7) | Bi4/Na4-O8  | 2.160 (8) |
| Bi3/Na3-O7  | 2.141 (7) | Bi4/Na4-O8  | 2.160 (8) |
| Bi3/Na3-O9  | 2.153 (6) | Bi4/Na4-O10 | 2.140 (6) |
| Bi3/Na3-O9  | 2.153 (6) | Bi4/Na4-O10 | 2.140 (6) |
| <b>Mean</b> | 2.098     | <b>Mean</b> | 2.100     |

|             |           |             |           |
|-------------|-----------|-------------|-----------|
| Bi5-O1      | 1.990 (6) | Bi6-O2      | 1.988 (6) |
| Bi5-O1      | 1.990 (6) | Bi6-O2      | 1.988 (6) |
| Bi5-O7      | 2.143 (7) | Bi6-O8      | 2.115 (8) |
| Bi5-O7      | 2.143 (7) | Bi6-O8      | 2.115 (8) |
| Bi5-O11     | 2.149 (6) | Bi6-O12     | 2.143 (6) |
| Bi5-O11     | 2.149 (6) | Bi6-O12     | 2.143 (6) |
| <b>Mean</b> | 2.094     | <b>Mean</b> | 2.082     |

|             |           |             |           |
|-------------|-----------|-------------|-----------|
| Bi7/Na7-O5  | 2.000 (9) | Bi8/Na8-O6  | 1.989 (7) |
| Bi7/Na7-O5  | 2.000 (9) | Bi8/Na8-O6  | 1.989 (7) |
| Bi7/Na7-O10 | 2.157 (6) | Bi8/Na8-O9  | 2.144 (6) |
| Bi7/Na7-O10 | 2.157 (6) | Bi8/Na8-O9  | 2.144 (6) |
| Bi7/Na7-O11 | 2.157 (6) | Bi8/Na8-O12 | 2.157 (6) |
| Bi7/Na7-O11 | 2.157 (6) | Bi8/Na8-O12 | 2.157 (6) |
| <b>Mean</b> | 2.104     | <b>Mean</b> | 2.096     |

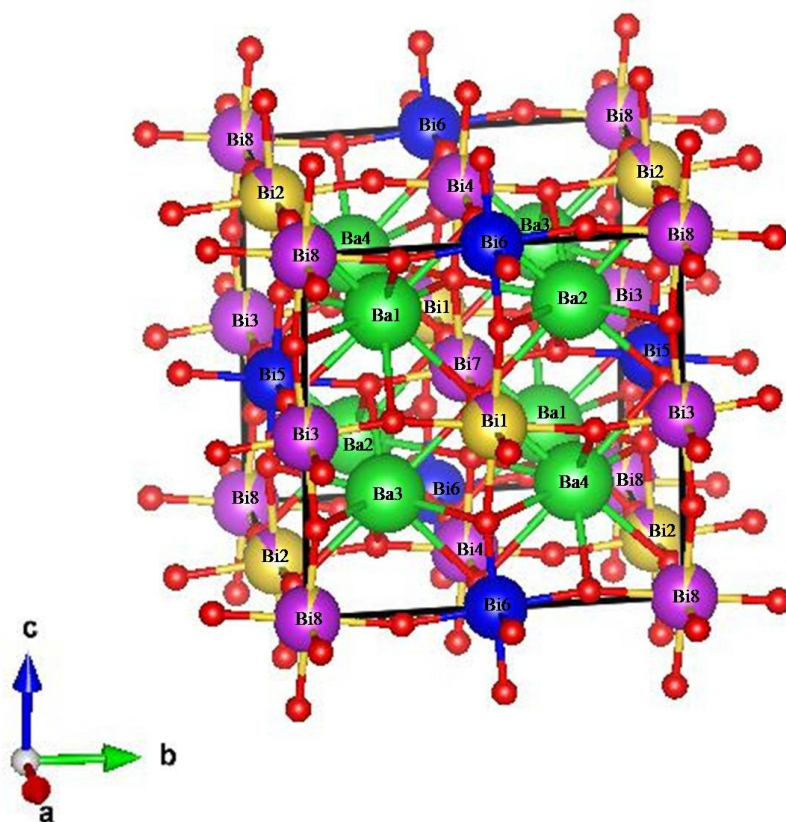

**Fig. S3.** Crystal structure of hydrothermally synthesized  $\text{Ba}_4\text{Bi}_3\text{NaO}_{12}$  at 240°C.

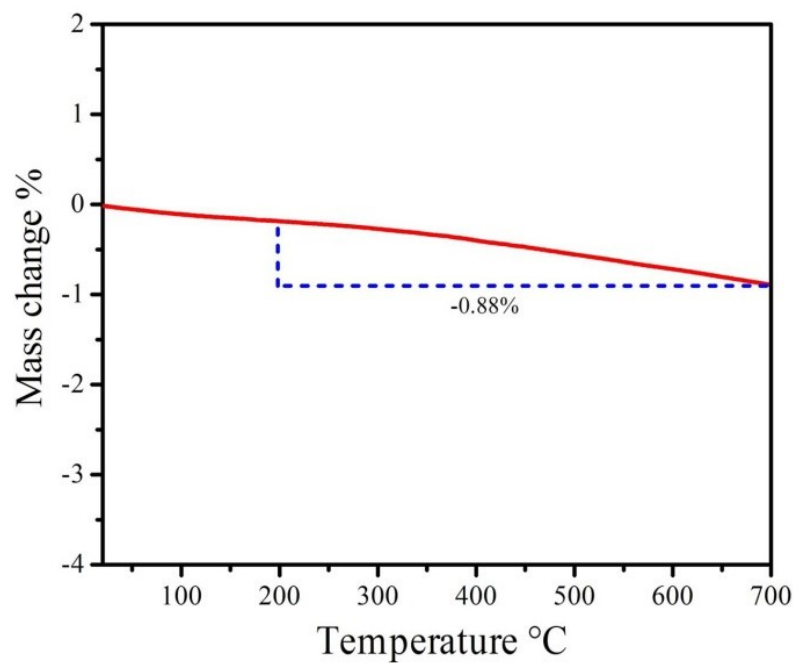

**Fig. S4.** TG curve of hydrothermally prepared  $\text{Ba}_4\text{Bi}_3\text{NaO}_{12}$  at  $240^\circ\text{C}$ .

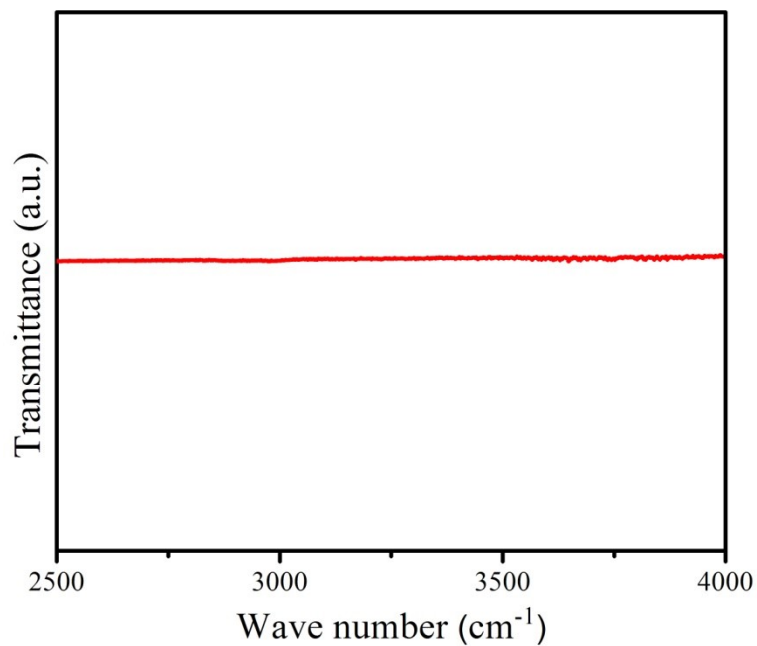

**Fig. S5.** FT-IR spectrum of hydrothermally prepared  $\text{Ba}_4\text{Bi}_3\text{NaO}_{12}$  at  $240^\circ\text{C}$ .

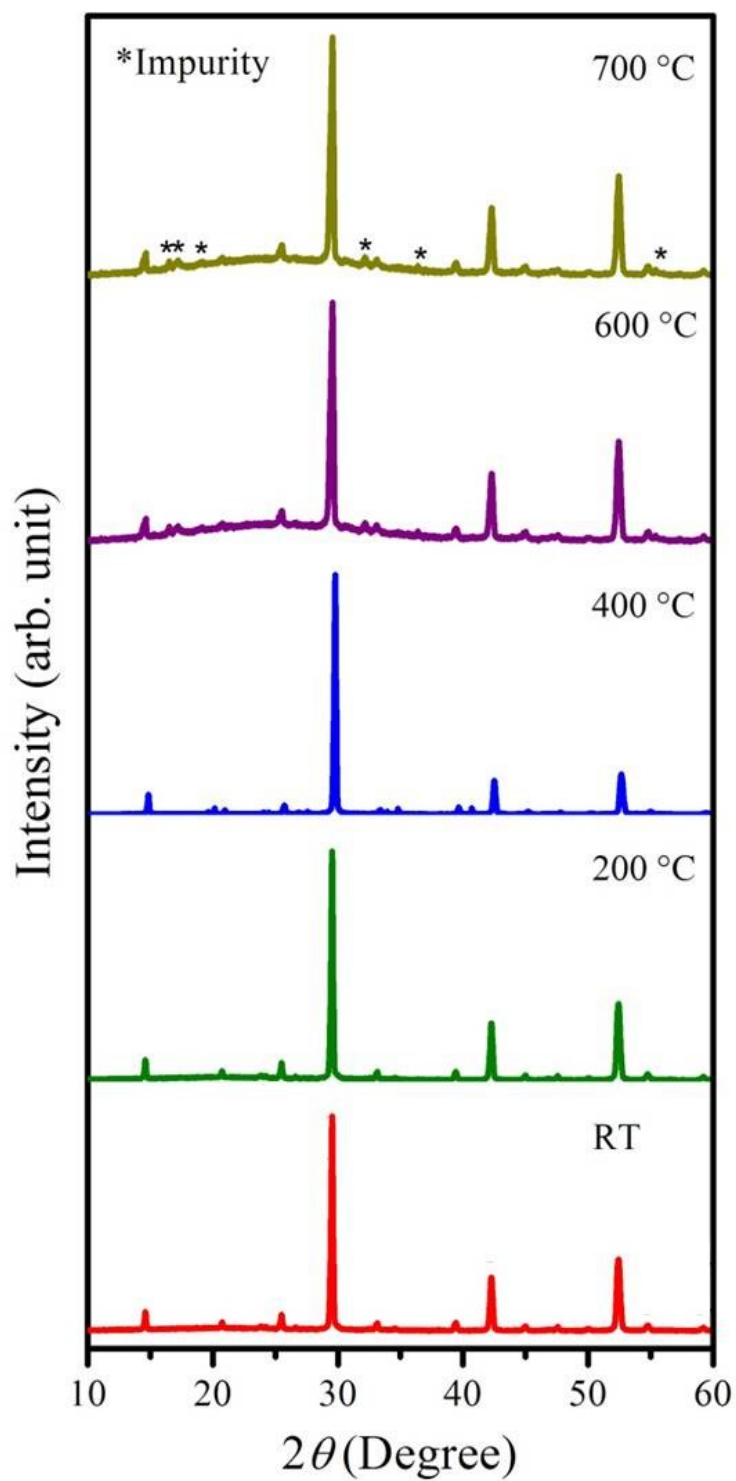

**Fig. S6.** XRD patterns of  $\text{Ba}_4\text{Bi}_3\text{NaO}_{12}$  heated at different temperatures from room temperature to 700 °C.



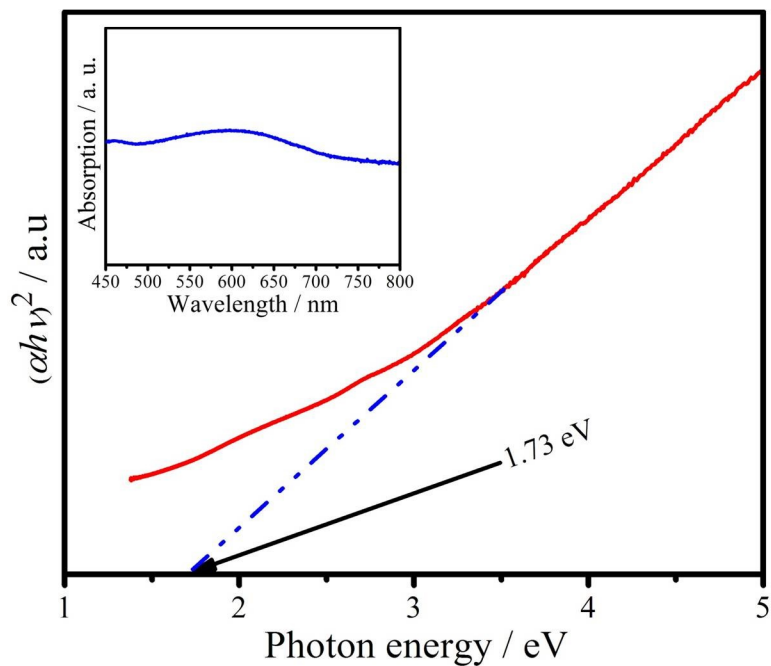

**Fig. S7.** Tauc plot for the estimation of the band gap of  $\text{Ba}_4\text{Bi}_3\text{NaO}_{12}$ . The inset shows the absorption spectrum.

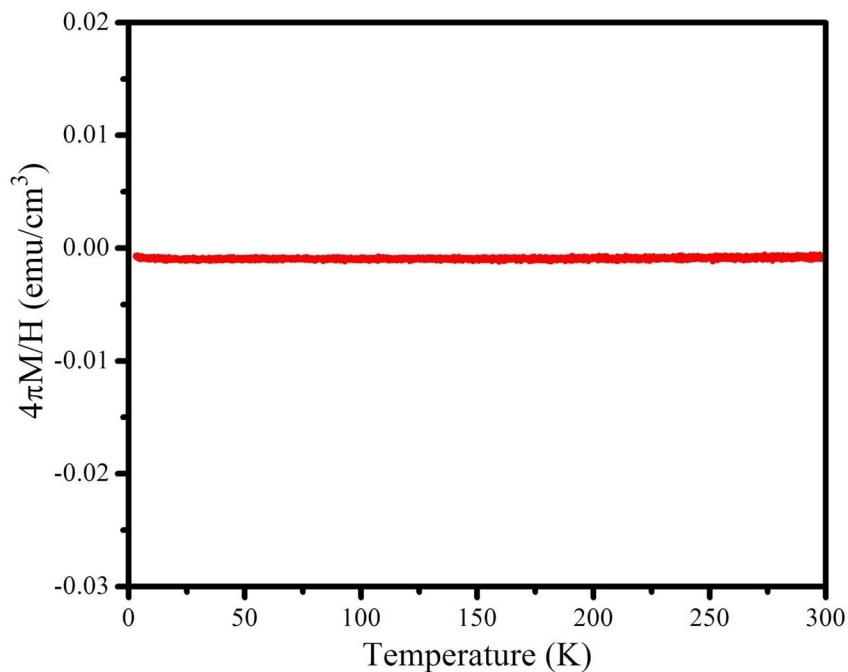

**Fig. S8.** DC magnetic susceptibility of hydrothermally synthesized  $\text{Ba}_4\text{Bi}_3\text{NaO}_{12}$ .

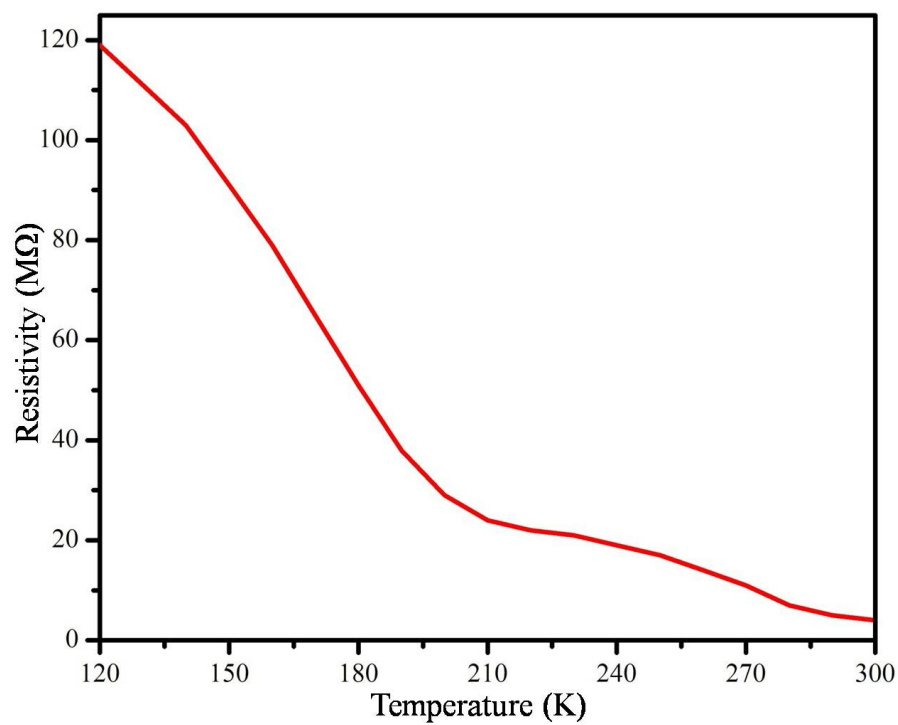

**Fig. S9.** Temperature-dependent electrical resistivity of hydrothermally prepared  $\text{Ba}_4\text{Bi}_3\text{NaO}_{12}$ .
